# Supplementary material for: Relevant and Non-Redundant Feature Selection for Cancer Classification and Subtype Detection
Source: MDPI journal article supplement (doi:10.3390/cancers13174297), 2021-08-26
Supplement: s1 [file s1]

## Supplementary Figures

### Relevant and Non-redundant Feature Selection for Cancer Classification and Subtype Detection

Pratip Rana, Phuc Thai,, Thang Dinh,, and Preetam Ghosh

Department of Computer Science, Virginia Commonwealth University, Richmond, VA 23284, USA

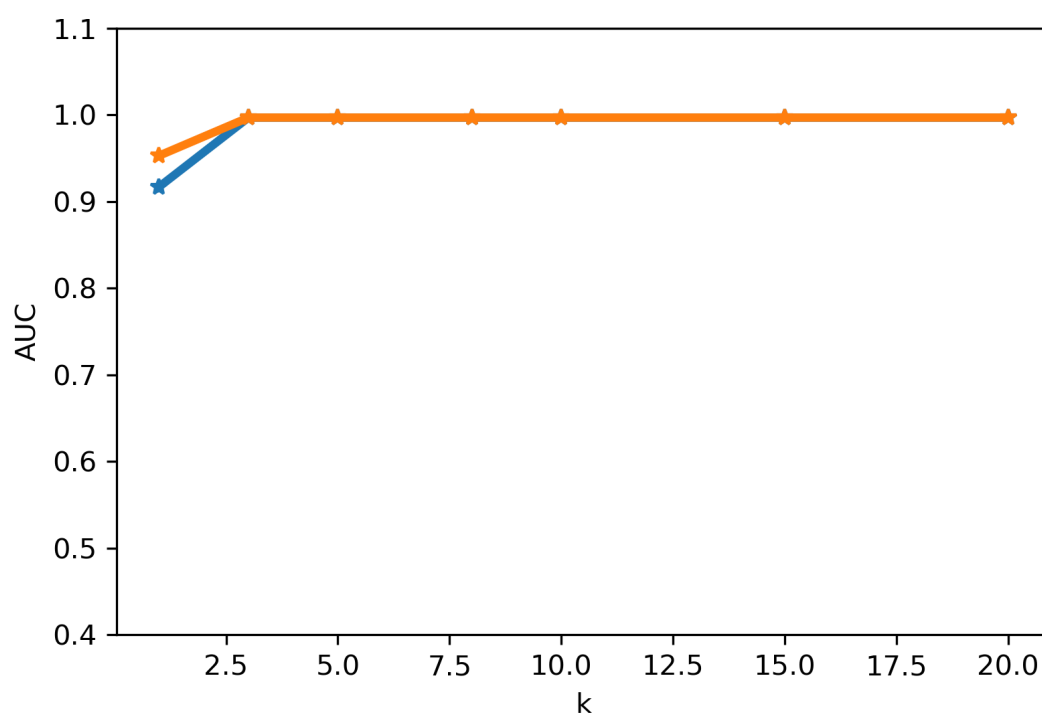

Figure S1: Classification accuracy of BRCA for two different cutoffs a)  $z_t=2$  (blue) b)  $z_t=3$  (orange)

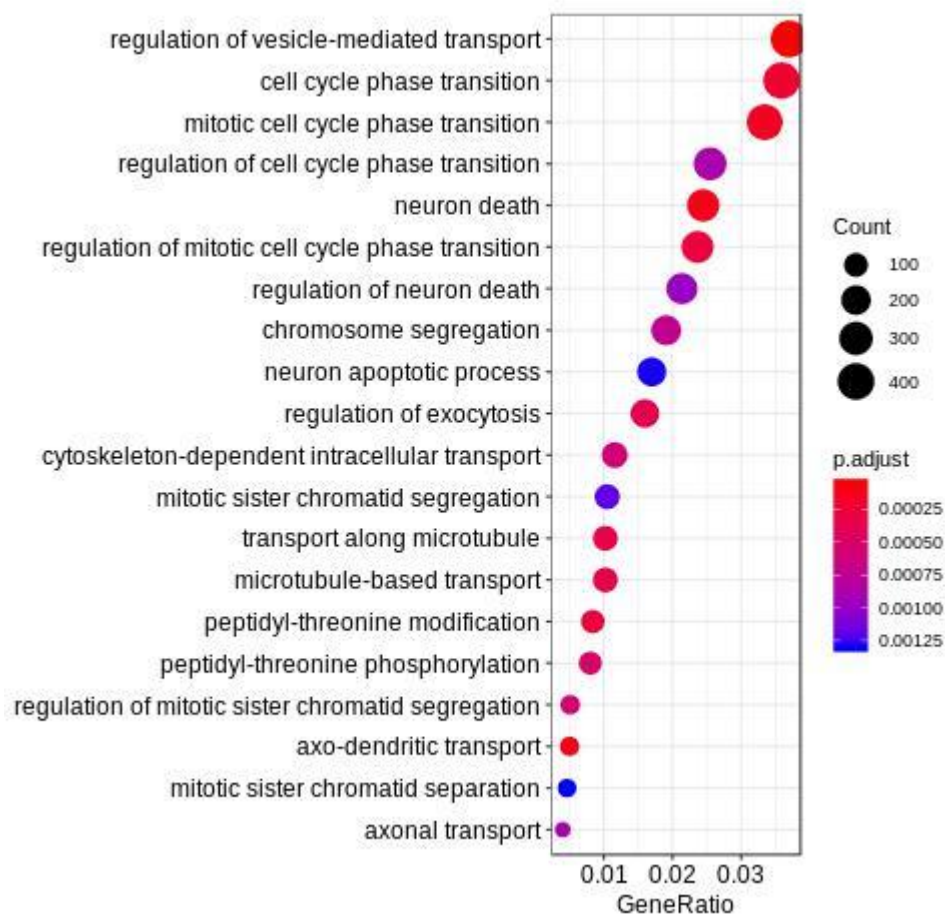

Figure S2: Functional analysis of GBM cluster 1

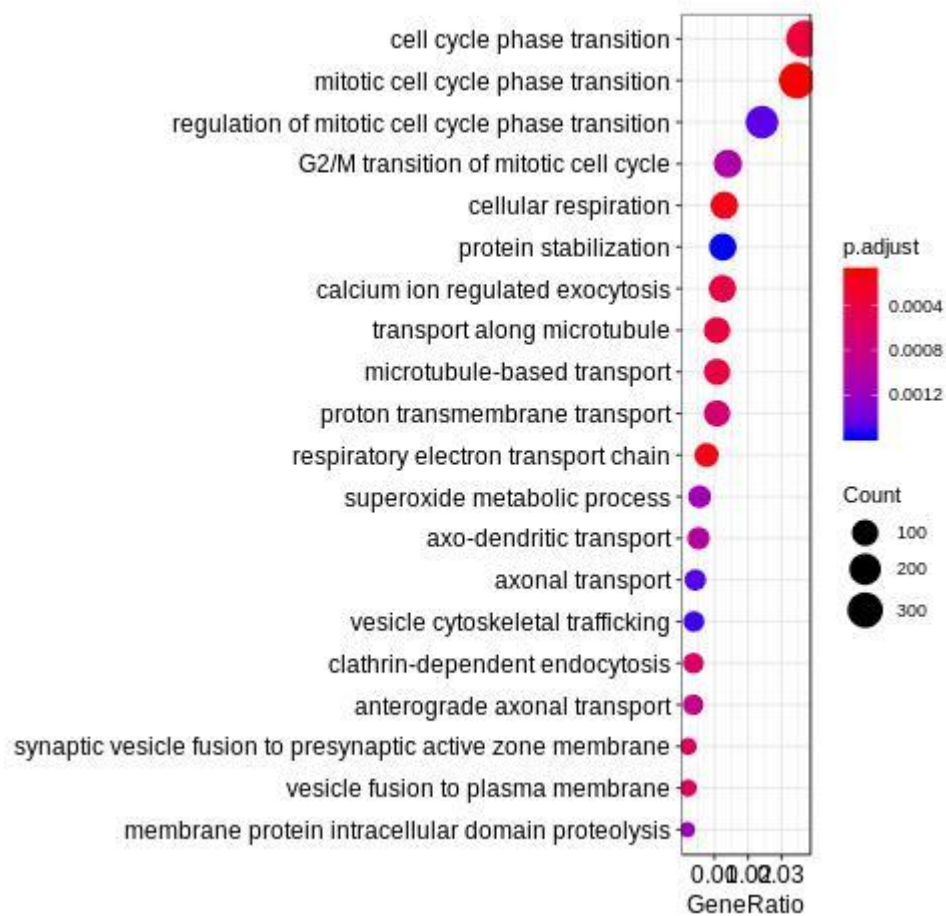

Figure S3: Functional analysis of GBM cluster 2

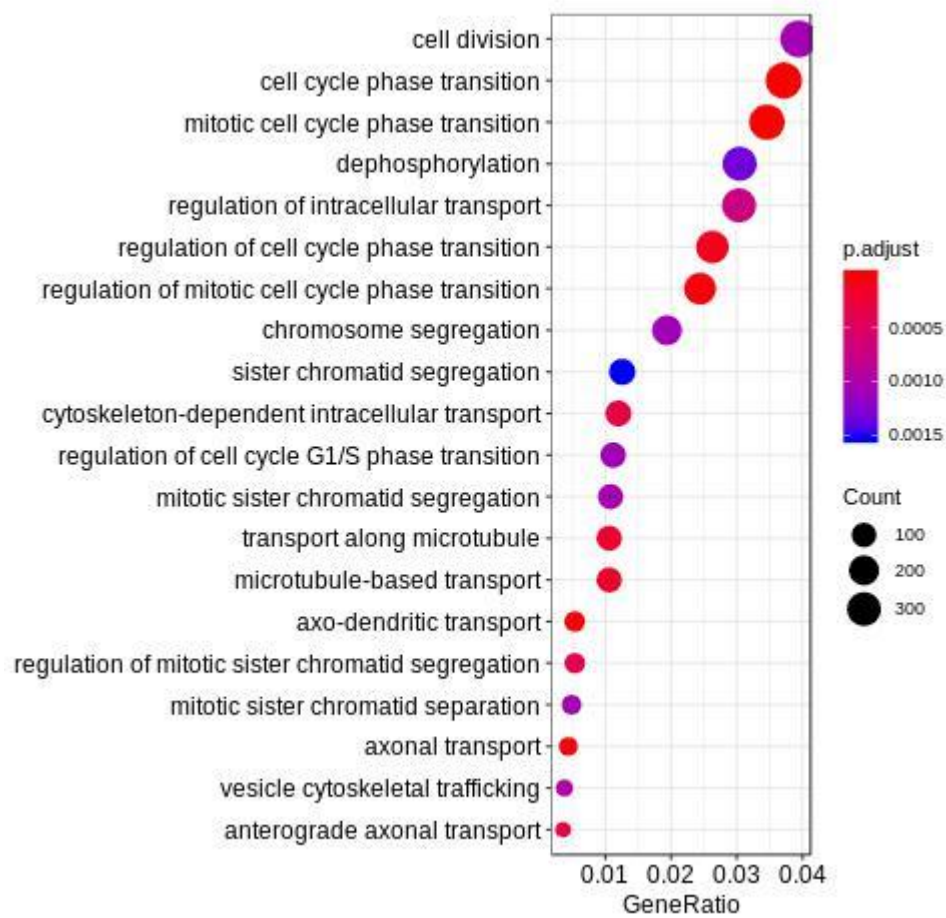

Figure S4: Functional analysis of GBM cluster 3

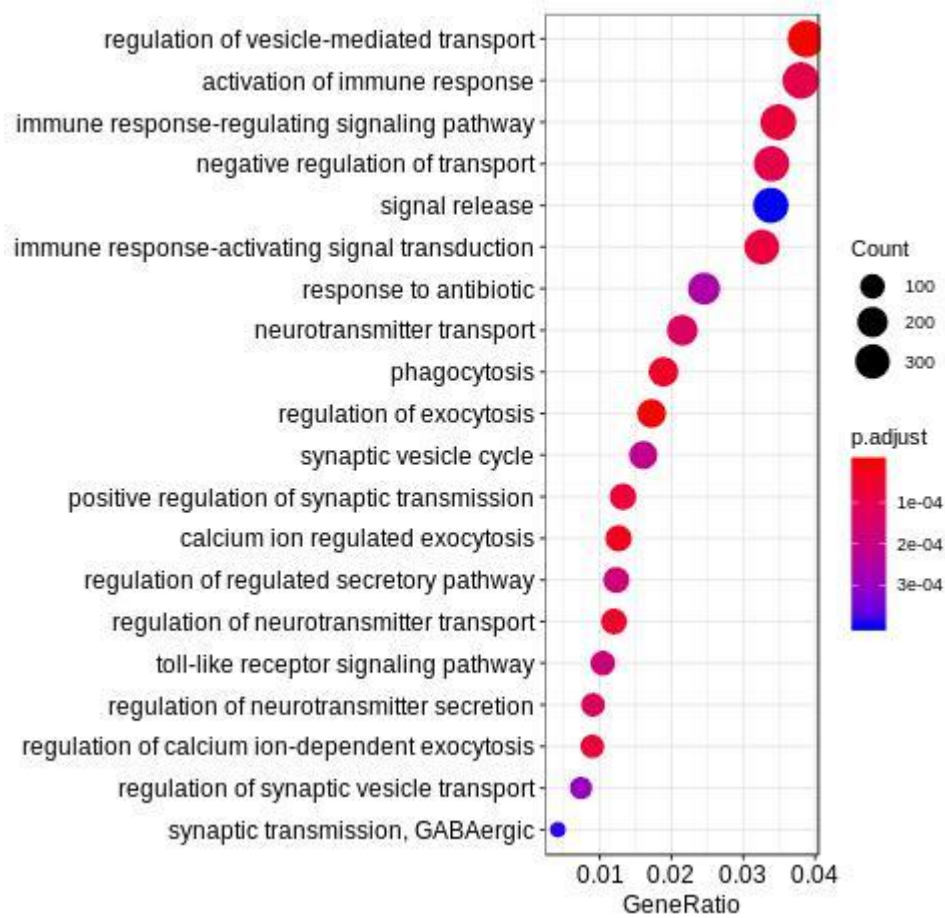

Figure S5 :Functional analysis of GBM cluster 4

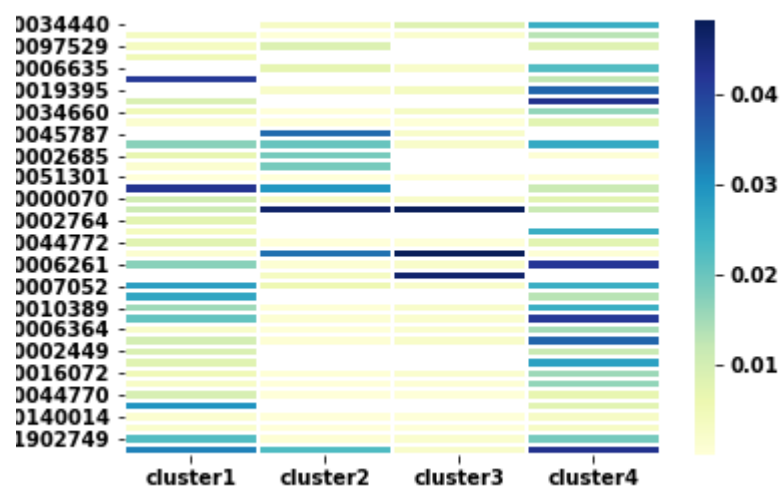

Figure S6: Enriched biological functions of each subtype of COAD cancer
